# Supplementary material for: Multiple cry Genes in Bacillus thuringiensis Strain BTG Suggest a Broad-Spectrum Insecticidal Activity
Source: MDPI journal article supplement (doi:10.3390/ijms241311137), 2023-07-06
Supplement: s1 [file s1]

**Table S1.** Nucleotide sequences of *cry* genes found in the genome of *Bacillus thuringiensis* subsp. *galleriae* strain BTG and the deduced amino acid sequences of Cry  $\delta$ -endotoxins.

| <i>Cry gene</i> | Length<br>(bp) | Sequence<br>(5'-3')                                                                                                                                                                                                                                                                                                                                                                                                                                                                                                                                                                                                                                                                                                                                                                                                                                                                                                                                                                                                                                                                                                                                                                                                                                                                                                                                                                                                                                                                                                                                                                                                                                                                                                                                                                                                                                                                                                                                | Amino<br>acids | Sequence                                                                                                                                                                                                                                                                                                                                                                                                                                                                                                                                                                                                                                                                                                                                                                                                                                                                                                                                                                                                                                                                                                                                                                                                                                                                                                                                                                                                                                   |
|-----------------|----------------|----------------------------------------------------------------------------------------------------------------------------------------------------------------------------------------------------------------------------------------------------------------------------------------------------------------------------------------------------------------------------------------------------------------------------------------------------------------------------------------------------------------------------------------------------------------------------------------------------------------------------------------------------------------------------------------------------------------------------------------------------------------------------------------------------------------------------------------------------------------------------------------------------------------------------------------------------------------------------------------------------------------------------------------------------------------------------------------------------------------------------------------------------------------------------------------------------------------------------------------------------------------------------------------------------------------------------------------------------------------------------------------------------------------------------------------------------------------------------------------------------------------------------------------------------------------------------------------------------------------------------------------------------------------------------------------------------------------------------------------------------------------------------------------------------------------------------------------------------------------------------------------------------------------------------------------------------|----------------|--------------------------------------------------------------------------------------------------------------------------------------------------------------------------------------------------------------------------------------------------------------------------------------------------------------------------------------------------------------------------------------------------------------------------------------------------------------------------------------------------------------------------------------------------------------------------------------------------------------------------------------------------------------------------------------------------------------------------------------------------------------------------------------------------------------------------------------------------------------------------------------------------------------------------------------------------------------------------------------------------------------------------------------------------------------------------------------------------------------------------------------------------------------------------------------------------------------------------------------------------------------------------------------------------------------------------------------------------------------------------------------------------------------------------------------------|
| <i>cry1Ab35</i> | 3546           | atggataacaatccgaacatcaatgaatgcattcctt<br>ataattgtttaagtaaccctgaagtagaagtattagg<br>tggagaaagaatagaaactggttacacccaatcg<br>atatttcctgtcgctaacgaatttctttgagtgaatt<br>tgttcccggctgctgattgtgtaggactagttgat<br>ataatatggggaatttttggtccctcctcaatgggacg<br>catttctgtacaaattgaacagttaattaaccaaag<br>aatagaagaattcgtaggaaccaagccatttctag<br>attagaaggactaagcaatcttatcaaatctacgca<br>gaatcttttagagagtgggaagcagatcctactaat<br>ccagcattaagagaagagatgcgtattcaattcaat<br>gacatgaacagtgccttacaacgcctattcctcttt<br>tgcagttcaaaattatcaagttcctctttatcagtata<br>tgttcaagctgcaaatttacattatcagtttgagag<br>atgtttcagtgttggacaaagggtgggatttgatg<br>ccgcgactatcaatagtcgttataatgatttaactag<br>gcttattggcaactatacagatcatgctgtacgctgg<br>tacaatacgggattagagcgtgtatggggaccgg<br>attctagagattggataagataatcaatttagaag<br>agaattaacactaactgtattagatatcgtttcttatt<br>tccgaactatgatagtagaacgtatccaattcgaac<br>agtttccaattaacaagagaaattatacaaaccca<br>gtattagaaaattttgatggtagtttcgaggctcgg<br>ctcagggcatagaagggaagtattaggagtccacat<br>ttgatggatatacctaacagtataaccatctatacgg<br>atgctcatagaggagaatattattggtcagggcac<br>aaataatggcttctcctgtaggggtttcggggccag<br>aattcactttccgctatatggaactatgggaaatgc<br>agctccacaacaacgtattgtgctcaactagggtca<br>gggcgtgtatagaacattatcgtccatttatataga<br>agacctttaatatagggataaataacacaactat<br>ctgttctgacgggacagaatttgcctatggaacctc<br>ctcaaatttccatccgctgtatacagaaaaagcgg<br>aacggtagattcgtggtatgaaataccgccacaga<br>ataacaacgtgccacctaggcaaggatttagtcac<br>gattaagccatgtttcaatgtttcgttcaggcttagt<br>aatagtagtgtaagtataataagagctcctatgttct<br>cttgatacatcgtagtctgaatttaataatataatt<br>ccttcatcacaattacacaaatccttaacaaaatc<br>tactaatctggccttggaacttctgtcgttaaagga<br>ccaggattacaggaggagatattcttgaagaact<br>tcacctggccagatttcaaccttaagagtaaatatta<br>ctgcaccattatcacaagatatcgggtaagaattc<br>gctacgcttctaccacaaatttacaattcctacatca<br>attgacggaagacctattaatcagggggaattttca<br>gcaactatgagtagtgggagtaatttacagtcggg<br>aagctttaggactgtaggttttactactcgtttaactt | 1181           | MDNNPNINECIPYNCLSNPEV<br>EVLGGERIETGYTPIDISLSLTQF<br>LLSEFVPGAGFVLGLVDIIWGIF<br>GPSQWDAFLVQIEQLNQRIEE<br>FARNQAISRLEGLSNLYQIYAES<br>FREWEADPTNPALREEMRIQF<br>NDMNSALTTAIPFAVQNYQV<br>PLLSVYVQAANLHLSVLRDVS<br>VFGQRWGFDAATINSRYNDLT<br>RLIGNYTDHAVRWYNTGLERV<br>WGPDSDRDWIRYNQFRRELTLT<br>VLDIVSLFPNYSRTYPIRTVSQ<br>LTREIYTNPVLENFDGSFRGSA<br>QGIEGSIRSPLMDILNSITIYT<br>DAHRGEYYWSGHQIMASPVG<br>FSGPEFTFPLYGTMGNAAPQQ<br>RIVAQLGQGVYRTLSSTLYRRP<br>FNIGINNQQLSVLDGTEFAYGT<br>SSNLPSAVYRKSGTVDSLDEIPP<br>QNNNVPPRQGFSHRLSHVSM<br>FRSGFSNSSVSIRAPMFSWIHR<br>SAEFNNIIPSSQITQIPLTKSTNL<br>GSGTSVVKGPFGTGGDILRRTS<br>PGQISTLRVNITAPLSQRYRVRI<br>RYASTTNLQFHTSIDGRPINQG<br>NFSATMSSGSNLQSGSFRTVGF<br>TTPFNFSNGSSVFTLSAHVFNS<br>GNEVYDRIEFVPAEVTFAEY<br>DLERAQKAVNELFTSSNQIGL<br>KTDVTDYHIDQVSNLVECLSD<br>EFCLDEKKELSEKVKHAKRLS<br>DERNLLQDPNFRGINRQLDRG<br>WRGSTDITIQGGDDVFKENYV<br>TLLGTDECYPTYLYQKIDESK<br>LKAYTRYQLRGYIEDSQDLEIY<br>LIRYNAKHETVNVPGTSLWP<br>LSAPSPIGKCGEPNRCAPQLE<br>WNPDLDCSCRDGKCAHHSH<br>HFSLDIDVGCTDLNEDLGWV<br>VIFKIKTDQDGHARLGNLEFLEE<br>KPLVGEALARVKRAEKKWRD<br>KREKLEWETNIVYKEAKESVD<br>ALFVNSQYDRLQADTNIAMIH<br>AADKRVHSIREAYLPELSVIPG<br>VNAAIFEELEGRIFTAFSLYDAR<br>NVIKNGDFNGLSCWNVKG<br>HVDVEEQNNHRSVLVPEWE<br>AEVSQEVRCVPGRGYILRVYAY<br>KEGYGEGCVTHIEIENNTDEL<br>KFSNCVEEEVYPNNTVTCNDY<br>TATQEEYEGTYTSRNRGYDGA<br>YESNSSVPADYASAYEEKAYTD<br>GRRDNPCESNRGYDYTPLPA<br>GYVTKELEYFPETDKVWIEIGE<br>TEGTFIVDSVELLLMEE |

---

ttcaaatggatcaagtgtatttacgttaagtgtcat  
gtcttcaattcaggcaatgaagtttatatagatcgaa  
ttgaattgttccggcagaagtaacctttgaggcag  
aatatgatttagaaagagcacaaaaggcggatgaat  
gagctgttacttctccaatcaaatcgggttaaaaa  
cagatgtgacggattatcatattgatcaagtatccaa  
tttagttgagtgttatctgatgaatttgtctggatga  
aaaaaaagaattgtccgagaaagtcaacatgcg  
aagcgacttagtgatgagcggaaattacttcaagat  
ccaaactttagagggatcaatagacaactagaccg  
tggctggagagggaagtacggatattaccatccaag  
gaggcgtgacgtattcaaagagaattacgttacg  
ctattgggtacctttgatgagtctatccaacgtattt  
atatcaaaaaatagatgagtcgaaattaaaagccta  
taccgttaccaattaagagggtatatcgaagatag  
tcaagacttagaaatctatttaattcgctacaatgcca  
aacacgaaacagtaaatgtccagggtacgggttcc  
ttatggccgctttcagccccaagtccaatcgga  
tgaggagaaccgaatcgatgcgcaccacaactga  
atggaatccagatctagattgttctgcagagacgg  
agaaaaatgtgccatcattcccatcatttctcttgg  
acattgatgttgatgtacagactaaatgaggactt  
aggtgtatgggtgatattcaagattaagacgcaag  
atggccatgcaagactaggaaatctagaatttctcg  
aagagaaccattagtaggagaagcactagctcgt  
gtgaaaagagcggagaaaaaatggagagacaa  
acgtgaaaaattggaatgggaaacaatattgttta  
taaagaggcaaaaagaatctgtagatgcttatttga  
aacttcaatatgatagattacaagcggataccaac  
atcgcatgattcatcggcagataaacgcgttcat  
agcattcgagaagcttatctgcctgagctgtctgtga  
ttccgggtgtcaatgcggctattttgaagaattaga  
agggcgtatttctactgcattctccctatatgatgcga  
gaaatgtcattaaaaatgggtatttaataatggctt  
atcctgctggaacgtgaaaggcatgtagatgtag  
aagaacaaaacaaccaccgttcggcttctgtgttcc  
ggaatgggaagcagaagtgacagaagaagttcgt  
gtctgtccgggtcgtggctatatcctcgtgtcacag  
cgtacaaggaggatggagaagggtgcgtaac  
cattcatgagatcgagaacaatacagacgaactga  
agtttagcaactgtgtagaagagggaagtatatcca  
aacaacacggtaacgtgtaattacttactgcgact  
caagaagaatatgagggtacgtacacttctcgtaat  
cgaggatgatgacggagcctatgaaagcaattcttct  
gtaccagctgattatgcatcagcctatgaagaaaa  
gcatatacagatggacgaagagacaatcctgtga  
atctaacagaggatattggggattacacaccactac  
cagctggctatgtgacaaaagaattagagtacttcc  
cagaaaccgataaggtatggattgagatcggaga  
aacggaaggaacattcattgtggatagcgtggaat  
tactccttatggaggaatag

---

atggatataaatcatcaaaatcaatgtataccctaca  
attgtttaagtaatcctgatgcgataacttagatgc  
ggaaaggctagaacaggaaacaccgtagcaga  
catttcattagggcttattaactttctataattttg  
taccaggcggagggttatagtaggttactagaat  
taatatgggggtttgtggggccctcgcaatgggag  
atfttttagctcaatagagcaattgattagtcaaag  
aatagaagaattgttaggaaccaagcaattctag  
attagaaggattaagcaataattatgagatttataca  
gaaacgtttcgggctgggaaaaggatccgtctaa  
tcctgcattgagagaagagatgcgtacccaatttaa  
tgtcatgaatagtgtctcatagcagctattctctttt  
aagagttcgttaattgaagttgtcttttatccgttta  
tgttcaggcagcaaattacacctatctgtgttaaga  
gatgtttcagtttacgggtcagagatggggccttgac  
ccagcgactgtcaatagtcgttatagcgatttaacta  
ggcttattcatgtttatactgatcattgtgtggatacg  
tataatgatgggttaaaaaatttagagggatctcga  
ttgtcagattgggtgtatataatcgcttcgaagac  
gattaacaatttctgtattagatattatagctttttccc  
aaattatgatatagaagcgatatccaatacaaacagc  
tagtcaattgacacgagaagtcctatctggattacct  
ttgttaatgaaactctatcccctccagcaagctatcc  
aactttctcagctgtcgaagtgtctataattagaagt  
cctcatttagtagacttttaaatagctttaccatttata  
cagatagctcggcaagttatgcataattggggaggg  
cacttggttaaattcttccgcacagggaactactacta  
atttgataagatcccctctatatggaagggaaggaa  
atacagagcgtcccgtactatttccgcacacctag  
cgtaccaataattagaacactttcataatttactggctc  
taacaataataatcctgtagctggaatcgaggag  
tggaattccaaaatactataagtagaagtatctatcg  
taaaagcgggtccaatagattcttttagtgaattacca  
cctcaagatgtcagtgatctcctgcaattgggtata  
gtcatcgtttatgccatgcaacattttagaacggatt  
agtggaccaagaatagcaggcaccgtatttcttg  
acacaccgtagtgtcgtcttataatgaagtaagt  
ccatctagaattacacaaattccatgggttaaaggcg  
catactcttgcgtctggtgcctctgtcattaaagggtc  
tggaattacaggcggagatattctgactaggaatag  
tatggggcgacctgggggccttacgagtaacctttac  
aggaagattaccacaaagtattatatacgtttccgtt  
atgcttcggtagcaaataggagtggttacatttagat  
attcacagccacctcgtatggaattcatttccaaaa  
actatggacgcaggtgaagcactaacatctcgttcg  
ttcgtcatacaacactcttactccaataacctttca  
cgagctcaagaagaatttgatctatacatccaatcg  
gggttttatatagatcgaattgaatttataccggtag  
atgcaactttgaatcagaaattaattagaagagc  
gcaaaaggcgggtgaatgccgtttacttctacaaa  
ccaactagggttaaaacagatgtgacggattatca

MDINHQNQCIPYNCLSNPDAI  
LLDAERLETGNTVADISLGLIN  
FLYSNFVPGGGFIVGELLEIWG  
FVGPSQWEIFLAQIEQLISQRIE  
EFARNQAISRLEGLSNNYEITY  
ETFRAWKDPSPNPALREEMRT  
QFNVMNSALIAAIPLLRVRNY  
EVALLSVYVQAANLHLSVLRD  
VSVYQQRWGFDPATVNSRYS  
LTRLIHVYTDHCVDTYNDGLK  
NLEGSRLSDWVVYNRFRRLTI  
SVLDIIAFFPNYDIEAYPIQTAS  
QLTREYVLDLPFVNETLSPPAS  
YPTFSAAESAIIRSPHLVDFLNS  
FTIYTDLSAYAYWGGHLVNSF  
RTGTTTNLIRSPLYGREGNTER  
PVTISASPSVPIFRTLSTYFTGLN  
NNNPVAGIEGVEFQNTISRSIY  
RKSGPIDSFSELPPQDVSVSPAI  
GYSHRLCHATFLERISGPRIAG  
TVFSWTHRSASPINEVSPSRITQ  
IPWVKAHTLASGASVIKGPFG  
TGGDILTRNSMGDLGALRVTF  
TGRLPQSYIRFRYASVANRSG  
TFRYSQPPSYGISFPKTM DAGE  
ALTSRSFAHTTLFTPIITFSRAQE  
EFDLYIQSGVYIDRIEFIPVDATF  
ESEINLERAQKAVNALFTSTN  
QLGLKTDVTDYHIDQVSNLVE  
CLSDEFCLDEKRELESEKVKHA  
KRLSDERNLLQDPNFRGINRQ  
PDRGWRGSTDITIQGGDDVFK  
ENYVTLTGTFDECYPTYLYQKI  
DESKLKAYTRYQLRGYIEDSQD  
LEIYLIRYNKHEIVNVPGTGS  
LWPLSVQSPIGKCGEPNRCAP  
HLEWNPDLDCSRDEEKCAH  
HSHHFLDIDVGCTDLNEDLG  
VWVIFKIKTQDGHARLGNLEF  
LEEKPLVGEALARVKRAEKKW  
RDKREKLELETNIVYKEAKESV  
DALFVNSQYDQLQADTNAMI  
HAADKRVHSIREAYLPELSVIP  
GVNAGIFEELEGRIFTAYSLEYD  
ARNVIKNGDFNGLSCWNVK  
GHVDVEEQNNHRSVLVVP  
EAEVSQEVVRVCPGRGYILRVTA  
YKEGYGEGCVTIHEVDNNTDE  
LKFSNCEKEQVYPGNTVACND  
YNKNHGANACSSRNRGYDES  
YESNSSIPADYAPVYEEAYTD  
GQRGNPCEFNRGHTPLPAGY  
VTAELEYFPETDTVWVEIGETE  
GTFIVDSVELLMEE

|               |      |                                                                                                                                                                                                                                                                                                                                                                                                                                                                                                                                                                                                                                                                                                                                                                                                                                                                                                                                                                                                                                                                                                                                                                                                                                                                                                                                                                                                                                                                                                                                                                                                                                                                                                                                                                                                                                 |      |                                                                                                                                                                                                             |
|---------------|------|---------------------------------------------------------------------------------------------------------------------------------------------------------------------------------------------------------------------------------------------------------------------------------------------------------------------------------------------------------------------------------------------------------------------------------------------------------------------------------------------------------------------------------------------------------------------------------------------------------------------------------------------------------------------------------------------------------------------------------------------------------------------------------------------------------------------------------------------------------------------------------------------------------------------------------------------------------------------------------------------------------------------------------------------------------------------------------------------------------------------------------------------------------------------------------------------------------------------------------------------------------------------------------------------------------------------------------------------------------------------------------------------------------------------------------------------------------------------------------------------------------------------------------------------------------------------------------------------------------------------------------------------------------------------------------------------------------------------------------------------------------------------------------------------------------------------------------|------|-------------------------------------------------------------------------------------------------------------------------------------------------------------------------------------------------------------|
|               |      | tattgatcaggtatccaatctagtgaatgtttatcgg<br>atgaatttgtctggatgaaaagagagaattgtccg<br>agaaagttaaacatgcgaagcgactcagtgatga<br>gcggaatttactcaagatccaaactcagagggat<br>caatagacaaccagaccgtggctggagaggaagt<br>acggatattaccatccaaggaggagatgacgtatt<br>caaagagaattacgtcacactaacagggtaccttga<br>tgagtgttatccaacgtatttatcaaaaaatagat<br>gagtcaaaaattaaagcctacactcgttatcaattaa<br>gagggtacatcgaagatagtaagacttagaaatc<br>tatttgatccgttacaatgcaaacacgaaatagta<br>aatgtgccaggcacgggttccttatggccgcttca<br>gtccaaagtccaatcggaagtgtggagaaccga<br>atcgtcgcgcgccacactgaatggaatcctgac<br>tagattgttctgcagagacgaggaaaaatgtgcc<br>catcattcgcatcatttctccttgacattgatgttggga<br>tgtacagacttaaatgaggacttaggtgtatgggtg<br>atattcaagattaagacgcaagatgggcacgcaag<br>actagggaaatctagagtttctgaagagaaccatt<br>agtaggagaagcactagctcgtgtgaaaagagcg<br>gagaaaaaatggagagacaaacgtgaaaaattg<br>gaattggaacaaatatcgtttataaaggaggcaaa<br>agaatctgtagatgctttattgtaaacttcaatatg<br>atcaattacaagcggatagcaatattgccatgattca<br>tgcggcagataaacgtgttcatagcattcgagaag<br>cgtatctccagagttagtctgtaattccgggtgtaaat<br>gcggggcattttgaagaattagaggacgtattttc<br>acagcctactctctatatgatgcgagaaatgtcatta<br>aaaatgggtgatttcaataatggcttatcatgctggaa<br>cgtgaaagggcatgtagatgtagaagaacaaaac<br>aaccaccgttcggctcctgtgttcgggaatgggaa<br>gcagaagtgtcacaagaagttcgtgtctgtccggg<br>tcgtggctatatccttcgtgtcacagcgtacaaaga<br>gggatattggagaaggctgcgtaactattcatgaag<br>tcgataataatacagacgaattgaagtttagcaact<br>gtgagaaagaacaagtatatccaggtaatacggta<br>gcatgtaatgattataataagaatcacgggtcgaat<br>gcatgtagttctcgtaatcgtggatatgacgaatctt<br>atgaaagtaattctccataccagctgattatgcacc<br>ggtttatgaagaagaagcgtatacagatggacaa<br>agagggaatcctgtgaatttaacagagggcatac<br>accattaccagctggttatgtgacagcagagttaga<br>gtacttcccagaaacggatagcagtatgggttgagat<br>tggagaaacggaagggaacatttatcgtggacagt<br>gtggaattactccttatggaggaatag |      |                                                                                                                                                                                                             |
| <i>cry1Fb</i> | 3525 | atgaagaataacattcaaaatcaatgcgtaccttac<br>aattgtttaagtaactctgaagtagaaatattaagt<br>aagaagaagtactggcagattaccgttagatatat<br>cctgtcgttacacgtttccttttgagtgaattgttcc<br>aggtgtgggagttgcgttggattatttgatttaatat<br>gggggtttataactccttctgaatggagttatttcttt                                                                                                                                                                                                                                                                                                                                                                                                                                                                                                                                                                                                                                                                                                                                                                                                                                                                                                                                                                                                                                                                                                                                                                                                                                                                                                                                                                                                                                                                                                                                                                                 | 1174 | MKNNIQNQCVYPYNCLSNPEV<br>EILSEERSTGRPLDISLSLTRFL<br>LSEFVPGVGVAFLFDLIWGFI<br>TPSEWSLFLQIEQLIEQRIETLE<br>RNRAITTLRGLADSYEVYLEAL<br>REWEENPNNAQLREDVRIRFA<br>NTDDALITAINNFTLTSFEIPLL<br>SVYVQAANLHLSLLRDAVSFG |

acagattgaacaactgattgaacaaagaattgaaa  
cattggaaaggaaccgggcaattactacattacga  
gggttagcggatagctatgaagttaccttgaggca  
ctaagagagtgggaagaaaatcctaataatgcaca  
attaagggaagatgtgcgtattcgattgctaataca  
gacgacgctttaataacagcaataaataatttacac  
ttacaagtttgaaatccctctttatcggctctatgtca  
agcggcgaatctacattatcactattaagagatgct  
gtatcgtttgggcagggttgggggctggatagc  
tactgttaataatcattataatagattaataaatcttat  
tcatagatatacgaacattgttggacacatacaat  
caaggattagaaaacttaagaggtactaatactcg  
acaatggtcaagattcaatcagtttaggagagagtt  
aacattgactgtattagatatcggtctcttttccgaa  
ctacgatgctagagcatatccaaltcaaacgtcatcc  
caattaacaagggaattatacaagttcagtaattg  
aagattctcagtttctgctaataatacctaattggttta  
atagagcgggaatttgagtttagaccgccccatctta  
tggactttatgaaltcttgttgaactgcagagact  
gtagaagtcaaactgtgtggggaggacacttagtt  
agttcacgaaatcggctggttaacctataaatttcc  
ctatttatgggatctcaatcctgggtggcgcaatttg  
attgcagatgaggatccacgtccttttatcggacatt  
atcagatcctgttttgtccgaggaggatttggaat  
cctcattatgtacttgggcttaggggagtagcatttc  
aaciaactggtacgaaccacacccgaacatttaga  
aatagtgggaccatagattctctagatgaaatcca  
cctcaggataatagtggggcaccttggaatgattat  
agtcatgtattaaatcatgttacatttgaaggtggc  
ctggtgagattgcaggaagtgtatcatggagagcg  
ccaatgttttcttgacacaccgtagtgcagatcgta  
caaatatcattaatccaaatataattacacaaatacct  
gctgtaaaagcacacaatctcattcgggttctacgg  
ttgtagaggacccgggtttacaggtggtgatctctt  
acgaagaacgaatactggtacattgcagatataa  
gagtaaatattactgggccattatctcaaagatatcg  
tgaagaattcgctatgcttctacgacagatttacaat  
ttttcacgagaatcaatggaacttctgtaaatcaagg  
taatttcaaagaactatgaatagaggggtaattt  
agaatctggaactttaggactgcaggatttagtac  
gccttttagttttcaaatgcgcaaagtacattcacatt  
gggtactcaggcttttcaaatcaggaagtttatata  
gatcgaaattgaattgtcccggcagaagtaacattc  
gaggcagaatctgatttagaaagagcgcaaaagg  
cggatgaatgccctgttacttctacaagccaactagg  
gctaaaaacaaatgtaacgggttaccatattgatca  
agtgccaatttagttgcgtgtttatcggatgaattt  
gtctggatgaaaagagagaattgtccgagaaagt  
aaacatgcgaagcgactcagtataagcggaattt  
actcaagatccaaactcagagggatcaataggc  
aaccagacatggctggagaggaagtacggatat

QGWGLDIATVNNHYNRLINLI  
HRYTEHCLDTYNQGLENLRG  
TNTRQWSRFNQFRRELTLTVL  
DIVALFPNYDARAYPIQTSSQL  
TREIYTSSVIEDSPVSANIPNGF  
NRAEFGVRPPHLMDFMNSLF  
VTAETVRSQTVWGGHLVSSRN  
TAGNPINFPIYGIFNPGGAIWI  
ADEDPRPFYRTLSDPVFVRGGF  
GNPHYVLGLRGVAFQQTGTN  
HTRTFRNSGTIDSLDEIPPQDN  
SGAPWNDYSHVLNHVTFVRW  
PGEIAGSDSWRAPMFSWTHRS  
ADRTNIINPNIITQIPAVKAHN  
LHSGSTVVRGPGFTGGDLLRR  
TNTGTFADIRVNITGPLSQRYR  
VRIRYASTDLQFFTRINGTSV  
NQGNFQRTMNRGGNLESGNF  
RTAGFSTPFSFSNAQSTFTLGT  
QAFSNQEVYIDRIEFVPAEVTF  
EAESDLERAQKAVNALFTSTS  
QLGLKTNVTGYHIDQVSNLVA  
CLSDEFCLDEKRESEKVKHA  
KRLSDKRNLQDPNFRGINRQ  
PDHGWRGSTDTIQGGDDVFK  
ENYVTLPGTFDECYPTLYQKI  
DESKLKAYTRYQLRGYIEDSQD  
LEIYLIRYNSKHEIVNVPGTGSL  
WPLSVENQIGPCGEPNRCAPH  
LEWNPDLHCSCRDEKCVHH  
SHHFSLDIDVGCTDLNEDLGV  
WLIFIKITQDGHARLGNLEFL  
EEEPLLGEALARVKRAEKKWR  
DKREKLQLETNIVYKEAKESV  
DALFVNSQYDRLQADTNAMI  
HAADKRVHRIREAYLPELSVIP  
GVNAAIFEELEGRIFTAYSLYD  
ARNVIKNGNFNGLLCWNV  
KGHVDVEEQNNHRSVLVIPE  
WEAEVSQKVRVCPGRGYILRV  
TAYKEGYGEGCVTIHEIEDNTD  
ELKFSNCVEEGYPNNTVTCNE  
YTMNQVGECTDACNVRNR  
GYEDAYGHNPTSPVHYTTPYE  
EETYTDERRENPCANKGYVN  
YTPLPVGYVTKELEYFPETDTV  
WIEIGETEGTFIVDSVELLMEE

|         |      |                                                                                                                                                                                                                                                                                                                                                                                                                                                                                                                                                                                                                                                                                                                                                                                                                                                                                                                                                                                                                                                                                                                                                                                                                                                                                                                                                                                                                                                                                                                                                                                                                  |      |                                                                                                                                                                                                                                                                                                                                                                     |
|---------|------|------------------------------------------------------------------------------------------------------------------------------------------------------------------------------------------------------------------------------------------------------------------------------------------------------------------------------------------------------------------------------------------------------------------------------------------------------------------------------------------------------------------------------------------------------------------------------------------------------------------------------------------------------------------------------------------------------------------------------------------------------------------------------------------------------------------------------------------------------------------------------------------------------------------------------------------------------------------------------------------------------------------------------------------------------------------------------------------------------------------------------------------------------------------------------------------------------------------------------------------------------------------------------------------------------------------------------------------------------------------------------------------------------------------------------------------------------------------------------------------------------------------------------------------------------------------------------------------------------------------|------|---------------------------------------------------------------------------------------------------------------------------------------------------------------------------------------------------------------------------------------------------------------------------------------------------------------------------------------------------------------------|
|         |      | tactatccaaggaggagatgacgtattcaaagaga<br>attacgttacgctaccgggtactttgatgagtgc<br>ccaacgtatttatatacaaaaaatagatgagtcg<br>ttaaagcctatacccggtatcaattaagagggtat<br>tcgaagatagtcaagacttagaaatctattaatcg<br>ttacaattcaaaacacgaaatagtaaattgaccagg<br>tacagggagtttatggcctcttctgtagaaaatcaa<br>attggacctgtggagaaccgaatcgatgcgcgcc<br>acaccttgaatggaatcctgattacactgttctgca<br>gagacggggaaaaatgtgtgcatcattctcatcatt<br>tctcttggacattgatgtcggatgtacagatttaa<br>gaggacctaggtgtatggtgatattcaagattaag<br>acgcaagatggccacgcaagactagggaatctag<br>agtttctcgaagaggaaccgttattaggcgaagcgt<br>tagcacgtgtgaagagagcggagaagaagtgga<br>gagacaaacgcgagaaactgcagttggaacaaa<br>tattgtctataaagaggcaaaagaatctgtagatgc<br>ttatttgaactctcaatatgatagattacaagcgg<br>atacgaacatcgcatgattcatgcggcagataaa<br>cgcttcatagaatccgggaagcgtatctgccaga<br>gttgtctgtgattccaggtgtcaatgcggccatttctg<br>aagaattagagggacgtattttacagcgtattcctt<br>atatgatgcgagaaatgttataaaaatggcaatttc<br>aataatggcttattatgctggaacgtgaaaggcat<br>gtagatgtagaagagcaaaacaaccaccgttcggt<br>cctgttatcccagaatgggaagcagaagtgtcaca<br>aaaagttcgtgtctgtccaggtcgtggttatatccttc<br>gtgttacagcgtacaaagagggataggagaagg<br>ttgcgtaacgatccatgagatcgaagacaatacag<br>acgaattaaagttagcaactgtgtagaagaagga<br>tatccaaacaacacggtaacgtgtaatgagtatact<br>atgaatcaaggggtaggagagtgtacggatgcat<br>gtaatgtccgtaatcgtggatatgaggatgcatatg<br>gacacaatccttaacgcctgttcattacacaacgcc<br>gtacgaagaagaacgtatacagatgaacgaaga<br>gagaatcctgtgaagctaacaagggtatgtgaa<br>ttacacgccactaccagttggttatgtgacaaaaga<br>attagaatacttcccagaaccgacacagtatggat<br>tgaaattggagaacggaaggaacattcattgtgg<br>acagcgtggaattactccttatggaggaatag |      |                                                                                                                                                                                                                                                                                                                                                                     |
| cry8Ea1 | 3501 | atggagataagtgaccagaatcaatacatccctat<br>aactgtttgaataatcctgaaagtgagatattaatg<br>ctagaaattccaatttcggactggtttctcaagtcag<br>ctcgggacttacgcgttttcttagaggcagctgtc<br>ccagaggctggttttgcaacttggcctattcgatatcat<br>ttggggcgctctaggcgttgatcaatggagcctattt<br>cttaggcagattgagcaattaatacgacaagaaata<br>acagagttagaaggaatagagcgactgcaatatt<br>aactggactatcgtcaagctataatctatatgttgag<br>gcgttaagagaatgggaaaatgatcctaataatcc<br>agcctcacaagaagagtagctacacgttttcgtct                                                                                                                                                                                                                                                                                                                                                                                                                                                                                                                                                                                                                                                                                                                                                                                                                                                                                                                                                                                                                                                                                                                                                             | 1166 | MEISDQNQYIPYNCLNNPESEI<br>FNARNSNFGVLSQVSSGLTRFL<br>LEAAVPEAGFALGLFDIIWGAL<br>GVDQWSLFLRQIEQLIRQEITE<br>LERNRATAILTGLSSYNLYVE<br>ALREWENDPNNPASQERVRT<br>RFRLTDDAIVTGLPTLAIRNLE<br>VVNLVYVYQAANLHLSLLRDA<br>VYFGERWGLTQANIEDLYTRL<br>TSNIQEYSDHCARWYNQGLN<br>EIGGISRRYLDQFQDLTISVLDI<br>VALFPNYDIRTYPIPTQSQLTRE<br>IYTSPPVAGNINFGLSIANVLR<br>APHLMDFIDRIVIYTNVSRSTP |

aacggacgacgctatagtaacagggttacctacttt  
ggcaattcggaaatctgaggtagtgaattatcagtc  
tatactcaagcagcaaatctacacttatcttggtaag  
agatgccgttactttggagaaagatggggattaac  
acaagcaaataattgaagatctgtacacaagactcac  
gagtaatatccaagaatattcagaccattgtgcaag  
atggtataatcaagggttaaatgagattggagggat  
aagtaggagataattggactccaagagatttaac  
aatttctgtcttagataattgtcgccctttcccaaattac  
gatatccgaacatatctattccgacacaaagtcaat  
taacaaggaggatttatacctctcccgctggtgcag  
gtaataaaaatttgggttaagtagcgaatgtattg  
agagcccctcatctgatggactttattgatcgaatg  
tcatttatacaaattcagttagaagtactccatattgg  
gcagggcatgaagtcatatcgagaagaacaggg  
caagggcaaggaaatgagataagatttctttatat  
ggagtggctgcaaagtcagaaccaccagttactat  
aagacctacaggatttactgatgagcaacgacaat  
ggtatagagcgcgatcgctgtgtctcgttagaa  
gttcagggtcaagacttttagttgtagatgccgtag  
galtccttactataatttagcgtgttcaatctatagaa  
atggcttggatttaacactgatactattgatgaaatt  
ccaattgaggggaaccgatccattcactggatagc  
caccgattatgccatgtgggcttcttgcgtcatctcc  
attcatcagtcagtagcaagggtcctataatttctt  
ggacgcaccgtagtgcaacccttacaatacaattg  
ctccagatgtcattaccaataaccgttagtaaagg  
cttcaatctcattcagggtgccacgattgttaaagga  
ccagggtttacagggtgggagatatcttcgaagaacg  
aatgttgtagcttggagatatgcgtgtaaacatta  
ctgcaccactatcacaaagatatcgcgtaaggaltc  
ggtatgcttctacgacagatttacaattctatacgaat  
attaatggaactactattaattggtaatttctcgag  
cactatggacagtggggatgatttacgtacggaa  
gattcagggtgcagggttactactccatttaccttt  
cagatgcaaacagcacattcacaatagggtgctttg  
gcttctctcaaacaacgaagtttatatagatcgaat  
tgaattgtcccggcagaagtaacattgaggcaga  
atatgatttagagaaagctcagaaagcggatgaatg  
cgctgttacttctccaatcaaatcggttataaaaca  
gatgtgacggactatcatattgataaagtatccaatc  
tagttgagtgttatcagatgaatttcttagatgaa  
aagcgagaattgtccgagaaagtcaaacatgcga  
agcgactcagtgatgagcggaatttactcaagatc  
caaacttcagaggcatcaatagacaaccagaccgt  
gggtggagagggaagtacggatattaccatcaagg  
aggagatgacgtattcaagagaattacgttacgct  
accgggtacctttagtggtgctatccaacgtattta  
tatcaaaaaatagatgagtcgaaattaaagtctat  
actcgttatcaattaagagggtatatcgaggatagt  
caagacttagaaatctatttaattcgctacaatgcaa

YWAGHEVISRRTGQGQGNEIR  
FPLYGVAANAEPVPTIRPTGFT  
DEQRQWYRARSRVVSFRSSGQ  
DFSLVDVAGFLTIFSAVSIYRNG  
FGFNTDTIDEIPIEGTDPFTGYS  
HRLCHVGFLASSPFISQYARAP  
IFSWTHRSATLTNTIAPDVITQI  
PLVKAFNLHSGATIVKGPFGFT  
GGDILRRTNVGSFGDMRVNIT  
APLSQRYRVRIRYASTTDLQFY  
TNINGTTINIGNFSSTMDSGDD  
LQYGRFRVAGFTTPTFTSDANS  
TFTIGAFGFSNNEVYIDRIEFV  
PAEVTFEAEYDLEKAQKAVNA  
LFTSSNQIGLKTVDYDHYDKV  
SNLVECLSDDEFCLDEKRELEK  
VKHAKRLSDERNLLQDPNFR  
GINRQPDRGWRGSTDITIQQG  
DDVFKENYVTLPGTFDGCYPT  
YLYQKIDESKLVYTRYQLRGY  
IEDSQDLEIYLIRYNAKHETVN  
VPGTGSWLPLSAQSPIGKCGEP  
NRCAPHLEWNPDLDCSCRNG  
EKCAHSHHFSLDIDVGCTDL  
NEDLGVWVIFIKITQDGHARL  
GNLEFLEEKPLLGEALARVKR  
AEKKWRDKREKLELETNIVYK  
EAKESVDALFVNSQYDQLQA  
DTNAMIHAADKRVHSIREAY  
LPELSVIPGVNAAFEELEGRIF  
TAFSLYDARNVIKNGDFNGL  
SCWNVKGHVDVEEQNNHRS  
VLVVPWEAEVSQEVRCVGR  
GYILRVTAKEGYGECVTHIE  
IENNTDELKFSNCVEEEVYPN  
NTVTCNDYTANQEEYKGAYTS  
HNRGYDEAYGNNPSVPADYT  
PVYEEKAYTDGRRENPCESNR  
GYGDYTPLPAGYVTKELEYFPE  
TDKVWIEIGETEGTFIVESVELL  
LMEE

|        |      |                                                                                                                                                                                                                                                                                                                                                                                                                                                                                                                                                                                                                                                                                                                                                                                                                                                                                                                                                                                                                                                                                                                                                                                                                                                                                                                                                                                                                          |     |                                                                                                                                                                                                                                                                                                                                                                                                                                                                                                                                                                                                |
|--------|------|--------------------------------------------------------------------------------------------------------------------------------------------------------------------------------------------------------------------------------------------------------------------------------------------------------------------------------------------------------------------------------------------------------------------------------------------------------------------------------------------------------------------------------------------------------------------------------------------------------------------------------------------------------------------------------------------------------------------------------------------------------------------------------------------------------------------------------------------------------------------------------------------------------------------------------------------------------------------------------------------------------------------------------------------------------------------------------------------------------------------------------------------------------------------------------------------------------------------------------------------------------------------------------------------------------------------------------------------------------------------------------------------------------------------------|-----|------------------------------------------------------------------------------------------------------------------------------------------------------------------------------------------------------------------------------------------------------------------------------------------------------------------------------------------------------------------------------------------------------------------------------------------------------------------------------------------------------------------------------------------------------------------------------------------------|
|        |      | aacacgaaacagtaaatgtgccaggtacgggttcc<br>ttatggccgctttcagcccaaagtccaatcggaag<br>tgtggagagccgaatcgatgcgcgccacacctga<br>atggaatcctgacttagattgttcgtgtaggaatgg<br>agaaaagtgtgccatcattcgcatcatttctccttag<br>acattgatgttgatgtacagatctaaatgaggacc<br>taggtgtatgggtgatctttaagattaagacgcaag<br>atggtcatgcaagattaggaaatctagagtttctcg<br>aagagaaaccattattaggggaagcactagctcgt<br>gtgaaaagagcggagaaaaaatggagagacaa<br>acgtgaaaaattggaattggaacaaatattgtttat<br>aaaggaggcaaaagaatctgtagatgctttatttga<br>aactctcaatatgatcaattacaagcggatacgaat<br>atcgcgatgattcatgcggcagataaacgcgttcat<br>agcattcgagaagcgtatctgccggagctgtctgtg<br>attccgggtgtcaatgcggcgattttgaagaattag<br>aagggcgtatttctactgcattctcctatatgatgcg<br>agaaatgtcattaaaaatggcgatttcaataatggc<br>ttatcatgctggaacgtgaaaggcgatgtagatgta<br>gaagaacagaacaaccatcgttcggtccttgtgttc<br>cagaatgggaagcagaagtgtcacaagaagtgcg<br>tgtttgtccgggtcgtggttatatccttcgtgtcacag<br>cgtacaaggagggatattggagaagggtgcgtaac<br>cattcatgagatcgagaacaatacagacgaactga<br>aattcagcaactgcgtagaagaggaagtatatcca<br>aacaacacggtaacgtgtaattgattatactgcaaat<br>caagaagaatacaaaagggtgcgtacacttctcataat<br>cgaggatatgacgaagcctatggaaataacccttc<br>cgtaccagcagattatacgccagtctatgaagaaa<br>aagcgtatacagatggacgaagagagaatccttgt<br>gaatctaacagagggtatggggattacacgccact<br>accagctggttatgtgacgaaggaattagagtactt<br>cccagaaaccgataaggtatggattgagattggag<br>aaacggaaggaacatttatcgtggagagcgtgga<br>attactccttatggaggaaatag |     |                                                                                                                                                                                                                                                                                                                                                                                                                                                                                                                                                                                                |
| cry1Ib | 2160 | atgaaactaaagaatccagataagcatcaaagcct<br>gtctagcaatgcgaaagtagataaaatcgctacgg<br>attcactaaaaaatgaacagatatagaattgaaaa<br>atatgaataatgaagattattgagaatgtctgagc<br>atgagagtattgatccgtttgttagtgcatacaaat<br>caaacgggtattggaattgctggaagattcttgggt<br>actctaggtgttccttttctggacaaatagctagcct<br>ctatagttttatcttaggcgagccttggcctaagggg<br>aaaagtcaatgggaaatcttatggaacatgtaga<br>agagattattaatcaaaaaatattaacttatgcaaga<br>aataaagcacttcagactgagaggattaggtgat<br>gctttagccgtctacatgaatcgcttgaagttggg<br>ttgaaaatcgtaataacactcgagcaggagtgta<br>gtcaagaaccaatatatcgcattagaactgatgtttg<br>ttcaaaaactaccttctttgcagtatctggtgaggaa<br>gtaccattattaccgatatatgcccaagctgccaat                                                                                                                                                                                                                                                                                                                                                                                                                                                                                                                                                                                                                                                                                                                                                                   | 719 | MKLKNPDKHQSLSSNAKV<br>DKIATDSLKNETDIELKNM<br>NNEYLRMSEHESIDPFV<br>SASTIQTGI<br>GIAGKILGTLGVPFAGQ<br>IASLYS<br>FILGELWPKGKSQWEI<br>FMEHV<br>EEIINQKILTYARNKALS<br>DLRG<br>LGDALAVYHESLESWVEN<br>RNRN<br>NTRARSVVKNQYIALELM<br>FVQ<br>KLPSFAVSGEEVPLLP<br>IYAQAA<br>NLHLLLLLRDASIFGKE<br>WGLSA<br>SEISTFYNRQVERTRDYS<br>DHCI<br>KWYNTGLNNLRGTNAKSW<br>V<br>RYNQFRKDMTLMVLDLVA<br>LFP<br>SYDTLVYPIKTTSQLTRE<br>VYTD<br>AIGTVHPNQAFASSTWY<br>NNN<br>APSFSAIEAAVIRSPHLL<br>DFLEK<br>VTIYSLLSRWSNTQYMN<br>MWG<br>GHRLESRPIGGALNTSTQ<br>GST<br>NTSINPVTLQFTSRDVY<br>RTESW<br>AGLNLFLTQPVNGVPRV<br>DFH |



|               |      |                                                                                                                                                                                                                                                                                                                                                                                                                                                                                                                                                                                                                                                                                                                                                                                                                                                                                                                                                                                                                                                                                                                                                                                                                                                                                                                                                                                                                                                                                                                                                                                                                                                                                                                                                                                                                                                                                                |     |                                                                                                                                                                                                                                                                                                                                                                                           |
|---------------|------|------------------------------------------------------------------------------------------------------------------------------------------------------------------------------------------------------------------------------------------------------------------------------------------------------------------------------------------------------------------------------------------------------------------------------------------------------------------------------------------------------------------------------------------------------------------------------------------------------------------------------------------------------------------------------------------------------------------------------------------------------------------------------------------------------------------------------------------------------------------------------------------------------------------------------------------------------------------------------------------------------------------------------------------------------------------------------------------------------------------------------------------------------------------------------------------------------------------------------------------------------------------------------------------------------------------------------------------------------------------------------------------------------------------------------------------------------------------------------------------------------------------------------------------------------------------------------------------------------------------------------------------------------------------------------------------------------------------------------------------------------------------------------------------------------------------------------------------------------------------------------------------------|-----|-------------------------------------------------------------------------------------------------------------------------------------------------------------------------------------------------------------------------------------------------------------------------------------------------------------------------------------------------------------------------------------------|
|               |      | <p>acatttgtgttattaagagatgcatctattttggaaa<br/> agaatggggattatcagcttcagaaattcaacattt<br/> tataaccgtcaagtcgaacgaacaagagattattcc<br/> gaccattgtataaatgggtataatacaggcctaaat<br/> aacttgaggggtacaaatgcaaaaagttgggttcg<br/> ttataatcaatttcgtaaagatatgacattaatggtat<br/> tagatttagttgcgctattccaagctatgatacactt<br/> gtatatcctatataaaccacttcacaacttacaagag<br/> aagtatatacagacgaattgggaccgtgcatccg<br/> aatcaagcttttgcaagtacgacttggtataataata<br/> atgcaccttcgtctctgcatagaggctgctgttctc<br/> cgaagtccacacttactgtatttctagaaaaagtta<br/> caatttacagcttattaagtcggtggagtaatactca<br/> gtatatgaatatgtggggaggacatagacttgaat<br/> cccgcccaataggaggggcaltaaatacctcaaca<br/> caaggatctaccaatacttcgattaatccagtaacat<br/> tacagttcacgtctcgagacgtttataggactgaatc<br/> atgggcagggctgaatttattttaactcaacctgtta<br/> atggagtacctagagttgatttccattggaaatttcc<br/> cacgctaccaatagcatctgataattttattatctag<br/> ggtatgctggagttggtacgcaattacaagattcag<br/> aaaatgaattaccacctgaaacaacaggacagcca<br/> aattatgaatcatatagtcatagattatcccatatag<br/> gactcatttcagcatccacgtgaaagcattggtata<br/> ttcttgacacatcgtagtgcagatcgtacaaatac<br/> aattgagccaaatagcattacacaaataccattagt<br/> aaaagcgttcaatctgtcttcaggtgccgctgtagt<br/> agaggaccaggatttacaggtggggatataccttcg<br/> aagaacgaatactggtacatttggggatatacagag<br/> taaataattaatccaccatttgcaaaagatatcgct<br/> gaggattcgctatgcttctactacagatttacaattcc<br/> atacgtcaattaacggtaaagctattaatcaaggta<br/> attttcagcaactatgaatagaggagaggacttag<br/> actataaaacctttagaactgtaggctttaccactcc<br/> atttagctttcagatgtacaaagtacattcacaatag<br/> gtgcttggaaacttcttcaggtaacgaagttatata<br/> gatcgaattgaattgttccggtagaagtaacatatg<br/> aggcagaatatgatttgaaaaagcgcaagagaa<br/> ggttactgcactgtttacatctacgaatccaagagg<br/> attaaaaacagatgtaaaggattatcatattgacca<br/> ggtatcaaatttagtagagtctctatcagatgaattct<br/> atcttgatgaaaagagagaattatcgagatagtta<br/> aatacgcgaagcaaatccatattgagcgtaacatgt<br/> ag</p> |     | <p>WKFTLPIASDNFYLYGAGV<br/> GTQLQDSENELPPETTGQPNY<br/> ESYSHRLSHIGLISASHVKALV<br/> YSWTHRSADRTNTIEPNSITQI<br/> PLVKAFNLSSGAAVVRGPGFT<br/> GGDILRRNTGTFGDIRVNINP<br/> PFAQRYRVIRIYASTTDLQFHT<br/> SINGKAINQGNFSATMNRGED<br/> LDYKTFRTVGFTTPEFSFSDVQS<br/> TFTIGAWNFSNGNEVIDRIEFV<br/> PVEVTYPEAEYDFEKAQEKVTA<br/> LFTSTNPRGLKTDVKDYHIDQ<br/> VSNLVESLSDEFYLDKRELFEI<br/> VKYAKQIHIERNM</p> |
| <i>cry2Ab</i> | 1902 | <p>atgaatagtgtattgaatagcgggaagaactactattt<br/> gtgatgcgtataatgtagcggctcatgatccatttag<br/> tttcaacacaaatcattagataccgtacaaaagga<br/> atggacggagtggaaaaaaataatcatagtttat<br/> acctagatcctattgttggaaactgtggctagtttctg<br/> ttaaagaaagtgaggagcttctgttggaaaaggat<br/> actaagtgagttacggaatttaataatttctagtgggt</p>                                                                                                                                                                                                                                                                                                                                                                                                                                                                                                                                                                                                                                                                                                                                                                                                                                                                                                                                                                                                                                                                                                                                                                                                                                                                                                                                                                                                                                                                                                                                                                                     | 633 | <p>MNSVLNSGRTTICDAYNVAA<br/> HDPFSFQHKSLDTVQKEWTE<br/> WKKNNHSLYLDPIVGTVASFL<br/> LKKVGSVLGKRILSELNLIFFS<br/> GSTNLMQDILRETEKFLNQRL<br/> NTDTVARVNAELTGLQANVE<br/> EFNRQVDNFLNPNRNAVPLSI<br/> TSSVNTMQQLFLNRLPQFQM<br/> QGYQLLLLPLFAQAANLHLSFI</p>                                                                                                                                        |

|        |      |                                                                                                                                                                                                                                                                                                                                                                                                                                                                                                                                                                                                                                                                                                                                                                                                                                                                                                                                                                                                                                                                                                                                                                                                                                                                                                                                                                                                                                                                                                                                                                                                                                                                                                                                                                                                                                                                                 |      |                                                                                                                                                                                                       |                                                                                                                                                                                                                                                                                                                                                                                                                                                                                                                                                   |
|--------|------|---------------------------------------------------------------------------------------------------------------------------------------------------------------------------------------------------------------------------------------------------------------------------------------------------------------------------------------------------------------------------------------------------------------------------------------------------------------------------------------------------------------------------------------------------------------------------------------------------------------------------------------------------------------------------------------------------------------------------------------------------------------------------------------------------------------------------------------------------------------------------------------------------------------------------------------------------------------------------------------------------------------------------------------------------------------------------------------------------------------------------------------------------------------------------------------------------------------------------------------------------------------------------------------------------------------------------------------------------------------------------------------------------------------------------------------------------------------------------------------------------------------------------------------------------------------------------------------------------------------------------------------------------------------------------------------------------------------------------------------------------------------------------------------------------------------------------------------------------------------------------------|------|-------------------------------------------------------------------------------------------------------------------------------------------------------------------------------------------------------|---------------------------------------------------------------------------------------------------------------------------------------------------------------------------------------------------------------------------------------------------------------------------------------------------------------------------------------------------------------------------------------------------------------------------------------------------------------------------------------------------------------------------------------------------|
|        |      | agtacaaatctaataatgcaagatatTTAAGAGAGACA<br>gaaaaattcctgaatcaaagacttaatacagacact<br>gttgcccgtgtaaatgcggaattgacagggctgca<br>agcaaatgtagaagagtttaatcgacaagtagata<br>atttttgaaccctaaccgaaacgctgttcctttatcaa<br>taacttcttcagttaatacaatgcaacaattatttctaa<br>atagattacccagttccagatgcaaggataccaac<br>tgttattattacctttatttgcacaggcagccaatttac<br>atctttctttattagagatgttattctaaatgcagatg<br>aatggggaatttcagcagcaacattacgtacgtatc<br>gagattacttgaaaaattatacaagagattactctaa<br>ctattgtataaatacgtatcaaagtgcgtttaaaggt<br>ttaaacactcgtttacacgatatttagaatttagaac<br>atatatgttttaaatgtatttgaatatgtatctatctg<br>gtcgttgtttaaatatcaaagcttcttagtatcttccgg<br>tgctaatttatatgcaagtggtagtgaccacagca<br>gaccaatcatttacttcacaagactggccattttat<br>attctctttccaagttaattcaaattatgtgttaaatg<br>gatttagtggtgctaggcttctaataccttccctaata<br>atagttggttacctggttctactacaactcacgcatt<br>gcttgctgcaagggttaattacagtggaggaatttc<br>gtctggtgatataggtgcatctccgtttaatcaaaatt<br>ttaattgtagcacatttctccccattgttaacgccat<br>ttgttaggagttggctagattcaggttcagatcggg<br>agggcggtgccaccgttacaattggcaaacagaa<br>tcctttgagacaactttagggttaaggagtgggtgctt<br>ttacagctcgcggtatttcaaactatttccagattatt<br>ttattcgtaataatttctggagttcctttagttgtagaa<br>atgaagatttaagaagaccgttacactataatgaaa<br>taagaaatatagcaagtccttcaggaacacctggtg<br>gagcacgagcttatatggtatctgtgcataacagaa<br>aaaataatatccatgccgttcatgaaaatggttctat<br>gattcatttagcgccaaatgactatacaggatttact<br>atttcgccgatacatgcaactcaagtgaataatcaa<br>acacgaacatttatttctgaaaaatttggaatcaag<br>gtgattccttaagggttgaacaaaataacacgacag<br>ctcgttatacgccttagagggaatggaatagttaca<br>atctttatlaagagtttctcaataggaaattccacta<br>ttcgagttactataaacggtagggtatatactgctac<br>aaatgttaatactactacaaataacgatggagttaat<br>gataacggagctcgttttcagatattaatatcggtat<br>atgtagtagcaagtagtaattctgatgtaccattaga<br>tataaatgtaacattaaactccggtactcaatttgatc<br>ttatgaatattatgctgtaccaactaatttccaccac<br>tttattaa |      |                                                                                                                                                                                                       | RDVILNADEWGISAATLRTRYR<br>DYLNKYNTRDYSNYCINTYQSA<br>FKGLNTRLHDMLEFRTYMFLN<br>VFEYVSIWSLFKYQSLLVSSGA<br>NLYASGSGPQQTQSFTSQDWP<br>FLYSLFQVNSNYVLNGFSGAR<br>LSNTFPNIVGLPGSTTTTHALLA<br>ARVNYSGGISSGDIGASPFNQN<br>FNCSTFLPPLLTpfvrsWLDsg<br>SDREGVATVTNWQTESFETTL<br>GLRSGAFTARGISNYFPDYFIR<br>NISGVPLVVRNEDLRRPLHYN<br>EIRNIASPSGTPGGARAYMVSV<br>HNRKNNIHAVHENGSMIHLA<br>PNDYTGTFTISPIHATQVNNQTR<br>TFISEKFGNQGDSLRFEQNNTT<br>ARYTLRGNGNSYNLYLRVSSIG<br>NSTIRVTINGRVYTATNVNTTT<br>NNDGVNDNGARFSDINIGNV<br>VASSNSDVPLDINVTLNSGTQF<br>DLMNIMLVPTNISPLY |
| cry9Ba | 3354 | atgtccgaaggagactatagactcgtatataaat<br>cctggaaatgttagaactggactacaaactggaatt<br>gatattgttcagtagtagtaggtgcttaggtgga<br>ccagttggtggcactactcactggttttcttactcttt<br>ttggtttctttggccatctaataatgcaagcagtagg<br>gaagctttatagaacaaatggaagaactgattgaa                                                                                                                                                                                                                                                                                                                                                                                                                                                                                                                                                                                                                                                                                                                                                                                                                                                                                                                                                                                                                                                                                                                                                                                                                                                                                                                                                                                                                                                                                                                                                                                                                                      | 1117 | MSEGDIYDSYNPGNVRTGLQ<br>TGIDIVAVVVGALGGPVGGILT<br>GFLSTLFGFLWPSNDQAVWEA<br>FIEQMEELIEQRISDQVVRTAL<br>DDLGTGIQNYYNQYLIALKEWE<br>ERPNGVRANLVLQRFEILHAL<br>FVSSMPSFGSGPGSQRFQAQLL<br>VVYAQAANLHLLLADAKEY |                                                                                                                                                                                                                                                                                                                                                                                                                                                                                                                                                   |

caaaggatatcagatcaagtagtaaggactgcact  
cgatgacttaactggaattcaaaattattataatcaat  
atctaatagcattaaaggaatgggaggaaagacc  
aaacggcgtaagagcaaacttagtttgcaaagatt  
tgaaatcttgacgcgctatttgtaagtagtatgcca  
agttttggtagtggccctggaagtcaaaggttcag  
gcacaattgttggtgtttatgcgcaagcagcaaatac  
ttcatttactatttagctgatgctgaaaagtatggg  
gcaagatggggactccgtgaatccagatagaatt  
atattttaatgaactacaaactcgactcgagattac  
accaaccattgtgtaacgcgtataataacgggta  
gccgggttacgaggaacgagcgctgaaagtgggt  
taaagtaccatcaaltccgagagaagcaaccttaa  
tggcaatggattgatagcttatttccatattataac  
acccggcgatatccaatcgagtaaactcctcagctt  
acacgtgaggtatatacagatccattaggcgcttctt  
ctgaagaatcaagtttatttccagaattgagatgctt  
aagatggcaagagacttctgcatgacttttcaa  
ttggaaaatgcaataatcgccaccacatctattg  
acacaataacaatttaattgattataccgggtcttct  
gcttactaacaatcaattaattgaagggtgattg  
gacattctgtaactagtagtttgggccagtgacc  
aacaacagtagtgagaagaaattacggtagcacg  
acatctattgtaactatttagtttaattgatcgatg  
gtttatcagattaatacagatcacatactgggtgg  
gattccagaacgcaccttatttggaaactactagagc  
tcaattttaccagggtgggacttattcagtaactcaac  
gaaatgcattaacatgtgaacaaaattataattcaat  
tgatgagttaccgagcctagacccaaatgaacctat  
cagtagaagttatagtcataagattatctcatattac  
cctatttgcatcggtattgactattgatggtattaata  
tatattcaggaaatctccctacttatgtatggacccat  
cgcatgtggaccttacaacacgattaccgcagat  
agaattacacaactaccattggttaaagtcatttgaaa  
tacctgcgggtactactgtcgtaagaggaccagggt  
ttacaggaggggatatactccgaagaacaggggt  
ggtacatttgaacaataagggttaaggactactgc  
cccctaacacaaagatatgcataagattccgttc  
gcttctaccacaaattgttcattggtataagagtgg  
tgatagacaagtaaattatttgacttcggaagaaca  
atgaacagaggagatgaattaagggtacgaatcttt  
gctacaaggaggttactactgatttatttagaca  
acctcaagaattaatctcagtggttgcaaatgcattta  
gcgctggtcaagaagttatttgatagaattgagat  
tatccccgttaatcccgacgagaggcgaaagagg  
atctagaagcagcaagaaagcggtggcgagctt  
gtttacacgcacaaggacggttacaagtaaatg  
tgaaagattatcaagtcgatcaagcgcaaattag  
tgtcatgcttatcagatgaacaatatgggtatgaca  
aaaagatgttattggaagcggtacgcgcgga  
acgcctcagccgagaacgtaacttactcagatcc

GARWGLRESQIELYNELQTRT  
RDYTNHCVNAYNNGLAGLRG  
TSAESWLKYHQFRREATLMA  
MDLIALFPYYNTRRYPIAVNPQ  
LTREYVDPLGVPSSESLFPEL  
RCLRWQETSAMTFSNLENAIIR  
PPHLFDTINNLMYTGSRFTN  
NQLIEGWIGHSVTSSLLASGPT  
TVVRRNYGSTTSIVNYFSFNDR  
DVYQINRSHTGLGFQNAFLF  
GITRAQFYPGGTYSVTQRNAL  
TCEQNYNSIDELPSLDPNEPISR  
SYSHRLSHITSYLHRVLTIDGIN  
IYSGNLPTYVWTHRDVLTNT  
ITADRIQLPLVKSFEIPAGTTV  
VRGPGFTGGDILRRTGVGTFG  
TIRVRTAPLTQRYRIRFEAST  
TNLFIGIRVGDRQVNYFDFGRT  
MNRGDELRYESFATREFTTDF  
NFRQPQELISVFANAFSAGQE  
VYFDRIEIPVNPAREAKEDLE  
AAKKAVASLFTTRDGLQVNV  
KDYQVDQAAANLVSCLSDEQY  
GYDKKMLLEAVRAAKRLSRER  
NLLQDPDFNTINSTEENGWKA  
SNGVTISEGGPFYKGRALQLAS  
ARENYPYIYQKVDASELKPYT  
RYRLDGFVKSSQDLEIDLIHHH  
KVHLVKNVPDNLVSDTYPDDS  
CSGINRCQEQQMUNAQLTE  
HHHPMDCCEAAQTHEFSSYI  
DTGDLNSSVDQGIWAFKVRT  
TDGYATLGNLELVEVGPLSGES  
LEREQRDNTKWSAELGRKRA  
ETDRVYQDAKQSINHFLFVDYQ  
DQQLNPEIGMADIMDAQNLV  
ASISDVYSDAVLQIPGINYEIYT  
ELSNRLQQASYLYTSRNAVQN  
GDFNGLDSWNATAGASVQ  
QDGNTHFLVLSHWDAQVSQQ  
FRVQPNCKYVLRVTAEKVGGG  
DGYVTIRDGAHHTETLTFNAC  
DYDINGTYVTDNTYLTKEVIFY  
SHTHEMWVEVNETEGAFHID  
SIEFVETEK

agattttaataacaatcaatagtacagaagaaaatgg  
 atggaaagcaagtaacggcggttactattagtgagg  
 gcgggtcattctataaaggccgtgcacttcagctag  
 caagtgcacgagaaaattatccaacatacatttattc  
 aaaaagtagatgcatcggagttaaaccttatacac  
 gatatagactagatgggttcgtgaagagtagtcaa  
 gatttagaaattgatctcattcaccatcataaagtcca  
 tcttgtagaaaatgtaccagataatttagtatctgata  
 cttaccagatgattcttgtagtggaatcaatcgatg  
 tcaggaacaacagatggtaaatgcgcaactggaa  
 acagagcatcatcatccgatggattgctgtgaagca  
 gctcaaacacatgagtttctctatattgatacagg  
 ggatttaaattcgagtgtagaccagggaatctggg  
 cgatcttaaaagttcgaacaaccgatggttatgcga  
 cgtaggaaatctgaattggtagaggtcggaccgt  
 tatcgggtgaatcttagaacgtgaacaaagggat  
 aatacaaaatggagtgcagagctaggaaagaaag  
 cgtgcagaaacagatcgcgtgtatcaagatgccaa  
 acaatccatcaatcatttattgtggattatcaagatc  
 aacaattaatccagaaatagggatggcagatatt  
 atggacgctcaaaatctgtcgcacatcaattcagatg  
 tatatagcgatccgtactgcaaatccctggaatta  
 actatgagatttacacagagctgtccaatcgcttaca  
 acaagcatcgtatctgtatacgtctcgaatgcggt  
 gcaaaatggggactttaacaacgggctagatagct  
 ggaatgcaacagcgggtgcatcgggtacaacagga  
 tggcaatacgcatttcttagttcttctcattgggatgc  
 acaagtttctcaacaatttagagtgcagccgaattgt  
 aaatatgtattacgtgtaacagcagagaaagtagg  
 cggcggagacggatagctgactatccgggatggt  
 gctcatcatacagaaacgcttacatttaatgcatgtg  
 attatgatataaatggcacgtacgtgactgataata  
 cgatatcaacaaaagaagtgatattctattcacatac  
 agaacacatgtgggttagaggtaaatgaaacagaa  
 ggtgcatttcatatagatagtattgaattcgttgaaa  
 cagaaaagtaa

Partial sequences

|               |            |                                                                                                                                                                                                                                                                                                                |           |                                                                                                              |
|---------------|------------|----------------------------------------------------------------------------------------------------------------------------------------------------------------------------------------------------------------------------------------------------------------------------------------------------------------|-----------|--------------------------------------------------------------------------------------------------------------|
| <b>cry9Aa</b> | <b>276</b> | gtgcagccgaattgtaaatatgtattacgtgtaaca<br>gcagagaaagtaggcggcgagacggatagctg<br>actatccgggatgatgctcatcatacagaaacgctt<br>acatttaatgcatgtgattatgatataaatggcacgt<br>acgtgactgataatacgtatctaacaaaagaagtg<br>gtattccatccggagacacacacatgtgggtaga<br>ggtaaatgaaacagaaggtgcatttcatatagata<br>gtattgaattcgttgaaacagaaaagtaa | <b>91</b> | MQPNCKYVLRVTAEKVGGGD<br>GYVTIRDDAHHHTETLTFNACD<br>YDINGTYVTDNTYLTKEVVFH<br>PETQHMWVEVNETEGAFHID<br>SIEFVETEK |
| <b>cry1Ac</b> | <b>135</b> | atggagagaccaacacgaaaaattacattgtaaa<br>ctccgatagatagtttacaatggatacgaacatt<br>gcaatgatttatacggcgataaacgcgttcataga<br>aaccgagaagcgtatcttcagagtga                                                                                                                                                                  | <b>44</b> | MERPTRKITFVNSRYDSLQMD<br>TNIAMITYADKRVHRNREAYL<br>SE                                                         |
